# Supplementary material
Source: publisher site journal article supplement (https://www.dovepress.com/article/242359)
Supplement: Supplementary file 1 [file get_supplementary_file.php]

**Magnetically directed enzyme prodrug prostate cancer therapy based on β-glucosidase/amygdalin**

Jie Zhou1,2, Jing Hou1,2, Jun Rao2,3, Conghui Zhou 2,4, Yunlong Liu5, Wenxi Gao 1,2

1Department of Urology, Hubei Provincial Hospital of Traditional Chinese Medicine, Wuhan, Hubei, People’s Republic of China; 2Hubei Province Academy of Traditional Chinese Medicine, Wuhan, Hubei, People’s Republic of China; 3Clinical Laboratory, Hubei Provincial Hospital of Traditional Chinese Medicine, Wuhan, Hubei, People’s Republic of China; 4Department of Pharmaceutical Sciences, Hubei Provincial Hospital of Traditional Chinese Medicine, Wuhan, Hubei, People’s Republic of China; 5Department of Urology, the First Affiliated Hospital of Zhengzhou University, Zhengzhou, Henan, People’s Republic of China

Corresponding Author: Jie Zhou

Email zhoujieuser@163.com

**Supporting Information**

**
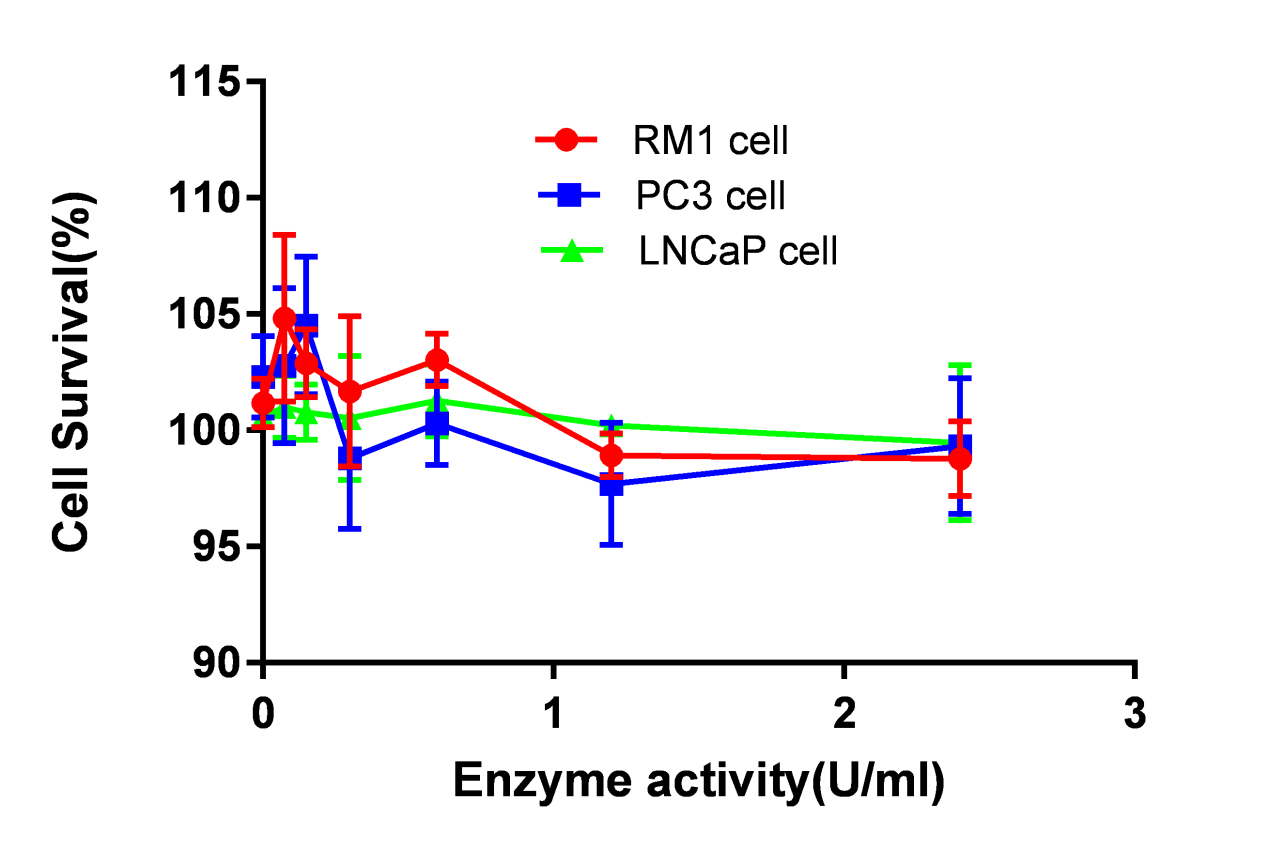
**

**Figure S1** Effects of free β-Glu on the growth of prostate cancer cells. The results suggested that β-Glu had a negligible effect on the growth of the 3 prostate cancer cell types (n=4).


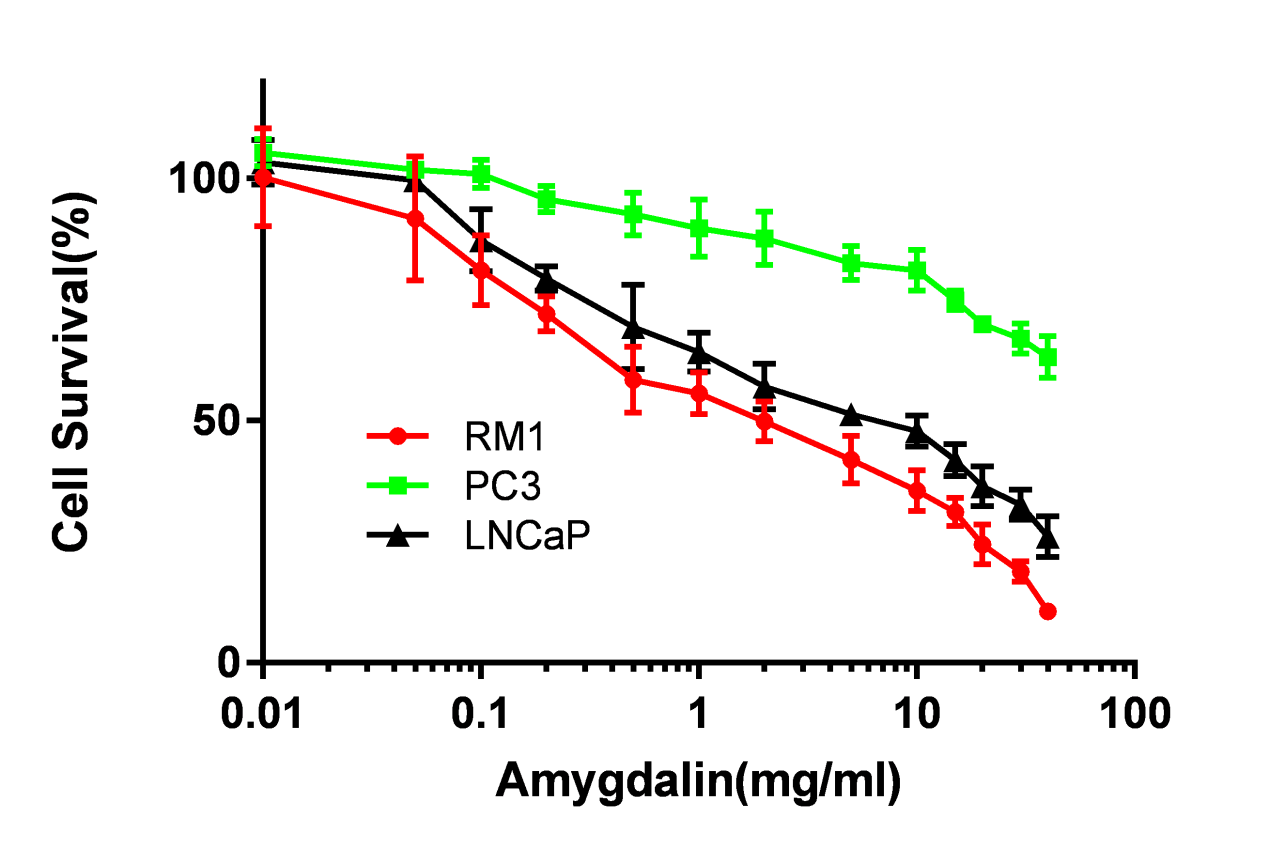


**Figure S2** Viability of RM1, PC3 and LNCaP cells treated with various concentrations of amygdalin combined with a low concentration of β-Glu (18.75 mU/ml). Compared with cell survival in the amygdalin alone group (Fig. 2A,2B,2C), a low concentration of β-Glu (18.75 mU/ml) significantly increased the killing effect of amygdalin on prostate cancer cells (*p* <0.01,n=4). Notably, for RM1 cells, the IC50 decreased 44.73-fold (1.83±0.50 mg/ml vs. 81.85±4.33 mg/ml).


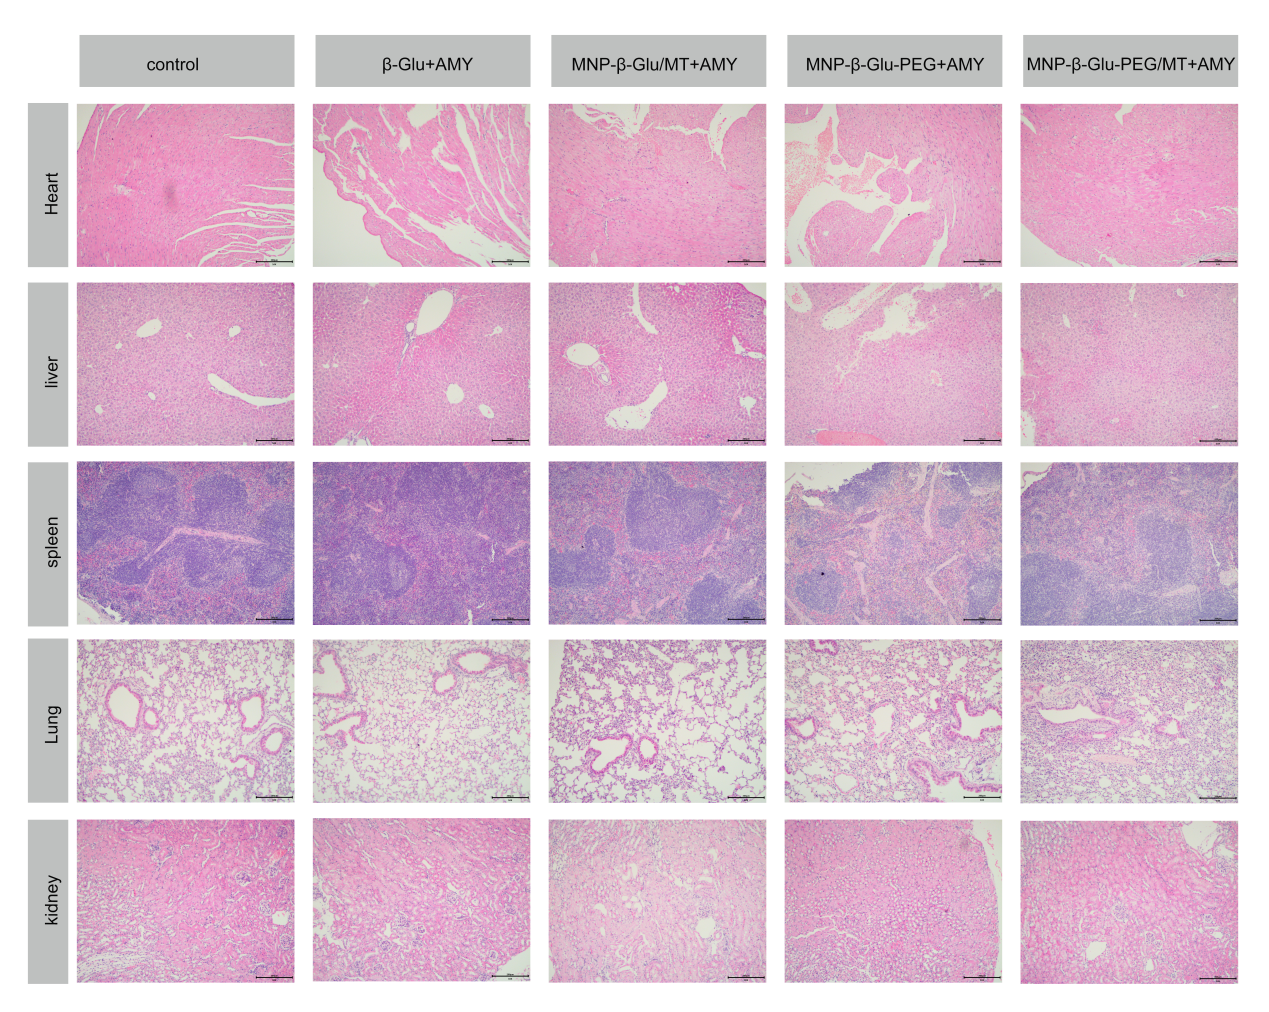


Figure S3 Representative images of HE-stained sections of the hearts, livers, spleens, lungs and kidneys of mice after drug administration. Scale bar: 200μm.
